# Supplementary material for: Functional and molecular defects of hiPSC-derived neurons from patients with ATM deficiency
Source: PubMed Central journal article supplement (PMC4123100; doi:10.1038/cddis.2014.310), 2014-07-17

**Carlessi et al, Functional and molecular defects of hiPSC-derived neurons from patients with ATM deficiency**

**Supplementary Fig. 1**

hiPSCs were able to generate differentiated neurons through embryoid body and neural rosette formation and subsequent culture in a mitogen-free medium containing N2. After 10 days, a large number of  $\beta$ -Tubulin III and Map2 positive cells were present whereas only few GFAP-expressing cells were detected.

**Supplementary Fig. 2**

The G1/G2-M ratio before and 24 h after IR treatment is shown for each cell type and determined from the flow cytometric analysis of the DNA histograms depicted in Fig 4.

**Supplementary Fig. 3**

Primary fibroblasts, hiPSCs, proliferating hNPCs and postmitotic neurons (D30) were compared by Western blot for the expression of the DDR proteins RAD51, RAD50, MRE11, NBS1, and XRCC1.  $\beta$ -Actin was used as a loading control.

**Supplementary Fig. 4**

D30 post-mitotic Ctrl and A-T cells were treated with 5 Gy IR, collected after 24 h and analyzed for DNA content by flow cytometry. The percentage of sub-diploid apoptotic cells is indicated.



# Sup. Fig.4

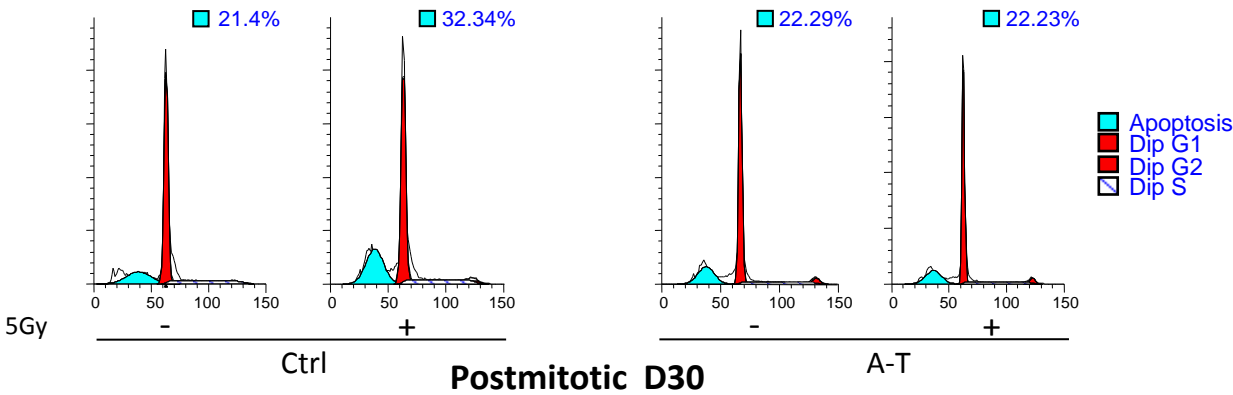

Supplement: cddis2014310x1.pdf [file cddis2014310x1.pdf]
